# Supplementary material for: Effectiveness of mRNA BNT162b2 Vaccine 6 Months after Vaccination among Patients in Large Health Maintenance Organization, Israel
Source: PubMed Central journal article supplement (PMC8798683; doi:10.3201/eid2802.211834), 2022-02
Supplement: 21-1834-Techapp-s1.pdf [file 21-1834-Techapp-s1.pdf]

# Effectiveness of mRNA BNT162b2 Vaccine 6 Months after Vaccination among Patients in Large Health Maintenance Organization, Israel

## Appendix

**Appendix Table 1.** Factors associated with natural logarithm of serologic titers by linear regression model\*

| Factor                        | B      | p value |
|-------------------------------|--------|---------|
| Days from vaccination         | -0.016 | <0.0001 |
| Male sex                      | -0.347 | <0.0001 |
| Age, y                        | -0.022 | <0.0001 |
| Socioeconomic status (middle) | -0.078 | 0.033   |
| Socioeconomic status (high)   | -0.184 | <0.0001 |
| Heart disease                 | -0.242 | <0.0001 |
| Diabetes                      | -0.108 | 0.007   |
| Hypertension                  | -0.105 | 0.001   |
| Chronic kidney disease        | -0.318 | <0.0001 |
| Immunosuppressive disorder    | -0.888 | <0.0001 |

\*R<sup>2</sup> = 0.498. Dependent variable is ln of serologic titer. Independent variables entered in hierarchical model: days from vaccination; sex, age, and socioeconomic status; chronic illnesses.

**Appendix Table 2.** Factors associated with a positive PCR result by univariate analysis

| Factor                     | No.       | No. positive (%) | p value* |
|----------------------------|-----------|------------------|----------|
| Sex                        |           |                  | <0.01    |
| M                          | 681,382   | 1,096 (0.16)     |          |
| F                          | 741,716   | 1,066 (0.14)     |          |
| Age group, y               |           |                  | <0.01    |
| <18                        | 84,025    | 67 (0.08)        |          |
| 18–44                      | 625,865   | 916 (0.15)       |          |
| 45–59                      | 375,826   | 697 (0.19)       |          |
| 60–74                      | 248,057   | 387 (0.16)       |          |
| ≥75                        | 89,325    | 95 (0.11)        |          |
| Socioeconomic status       |           |                  | <0.01    |
| Low                        | 228,613   | 106 (0.05)       |          |
| Middle                     | 706,198   | 976 (0.14)       |          |
| High                       | 488,287   | 106 (0.05)       |          |
| Heart disease              |           |                  | 0.03     |
| No                         | 1,348,587 | 2,026 (0.15)     |          |
| Yes                        | 74,511    | 136 (0.18)       |          |
| Diabetes                   |           |                  | 0.47     |
| No                         | 1,299,843 | 1,982 (0.15)     |          |
| Yes                        | 123,255   | 177 (0.14)       |          |
| Hypertension               |           |                  | 0.22     |
| No                         | 1,149,913 | 1,770 (0.15)     |          |
| Yes                        | 273,185   | 392 (0.14)       |          |
| Chronic kidney disease     |           |                  | 0.01     |
| No                         | 1,355,164 | 2,083 (0.15)     |          |
| Yes                        | 67,934    | 79 (0.12)        |          |
| Immunosuppressive disorder |           |                  | 0.76     |
| No                         | 1,406,560 | 2,139 (0.15)     |          |
| Yes                        | 16,538    | 23 (0.14)        |          |

\*By  $\chi^2$ /Fisher exact test statistic.
